# Supplementary material
Source: Copernicus journal article supplement (doi:10.5194/egusphere-2026-853)
Supplement: Supplementary file [file egusphere-2026-853-AC2-supplement.pdf]

## Response to Reviewer 2:

We would like to thank the reviewer for the constructive feedback on our manuscript and for aiding our progress towards publication. These comments were very useful, and we appreciate the time taken to help improve the paper. Each comment is repeated here, and our responses are given below each one in blue text. Excerpts from the text of the paper are given in *italics*, where **new additions are bolded** and text removed is noted using ~~strikethrough~~. All line numbers mentioned in our responses correspond to the line numbers in the updated version of the manuscript. Figures provided to answer reviewer questions are labelled as A, B, C, etc. to not be confused with numbered figures in the manuscript.

The manuscript documents relationships between above- and below-cloud CCN retrievals from a HSRL (and a neural network) with cloud microphysics estimated from the Research Scanning Polarimeter during ORACLES field campaign, over the Southeast Atlantic Ocean.

This is an interesting manuscript that makes a clever use of airborne remote sensors for investigating the aerosol indirect effect. The integration of vertically resolved lidar retrievals is particularly appealing, with a methodology carefully crafted to minimize sampling biases through a spatiotemporal collocation that accounts for the typical spatial variability of aerosols. This manuscript will be an important reference for advancing the way we use remote sensors for investigating aerosol-cloud interactions and cloud adjustments. My recommendation is acceptance after minor revisions.

Thank you for the constructive and positive feedback on our study!

Comments:

1. It is somewhat intriguing that the below-cloud CCN shows a weaker slope with cloud droplet number concentration ( $N_d$ ) than the above-cloud CCN. Of course, chances are that some unknown artifacts could be conspiring to reduce the correlation between below-cloud CCN and  $N_d$ . For instance, there is a big contrast in relative humidity between the boundary layer (BL) and the free troposphere (FT), which might be affecting the CCN estimate. Or, this could reflect issues with ERA-5 and its inability of properly represent the BL depth (e.g. an underestimation of the BL height). A way to partially test the “artifact” hypothesis would be to derive ACI and correlations between in-situ CCN and  $N_d$  for a number of specific (in-situ) profiles and see whether this in-situ ACI is comparable to the remotely-sensed ACI. This in-situ estimates for ORACLES might be already available in the literature.

We would like to thank the reviewer for the comments and thoughts about this weak below-cloud  $N_{CCN}$  relationship with cloud microphysical properties and acknowledge that the manuscript should have more directly addressed and interpreted the implausibility of such a weak relationship. Based on figure visualization suggestions from both reviewers, we noticed more of a trend/pattern in what was originally Figure B1

and have moved this figure to the main text as Figure 9. A further discussion of our interpretation of this updated figure and associated changes made to the manuscript are located at the end of this document (“Below-Cloud Edits” section).

We have discussed with other collaborators the possibility of extending this study to include APR-3 observations and a comparison with in situ flight legs. Since overlap between remote sensing and in situ observations only exists for four days of ORACLES-2016 and is also less frequent for ORACLES 2017-2018 due to use of two aircraft instead of one, collocation between the RSP, ML-CCN, and in situ flight legs will take more careful consideration than time has allowed for during the revision process. Therefore, while we have not included an in situ comparison here, this may be included as an aspect of possible future work.

2. The machine learning CCN follows the methodology of Redemann and Gao (2024), however, the input parameters are not identical, which is reduced in Lenhardt et al. This is a reasonable approach, however, the whether the performance of this ML is similar to Redemann&Gao is unknown. Is this information reported in another article? Is the performance similar?

Thank you for catching that we neglected to include this detail in the manuscript. This information is not reported in a different article, so we have added the following to Lines 148-150 in the revised manuscript: **“Compared to the model trained with the full set of HSRL-2 observables (15 % MRE), this adjusted model has an MRE of 19.9%. This adjustment to improve data availability only results in a modest increase in the MRE of the  $N_{CCN}$  prediction.”** We also include the comparison figure that this MRE

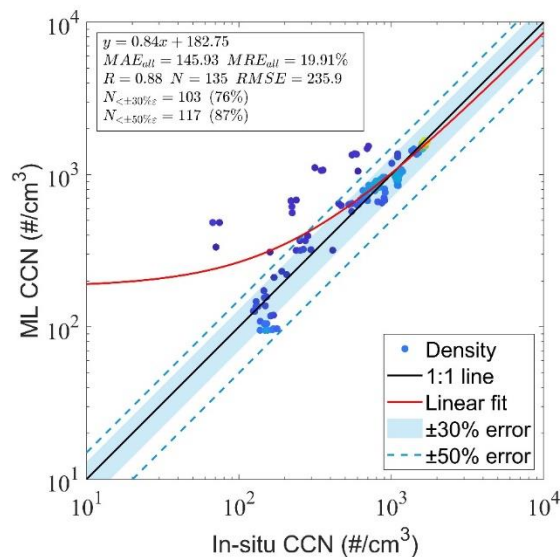

Figure A. ML-CCN performance for reduced number of lidar observables (BSC532, BSC1064, DEPO532, DEPO1064).

comes from (Fig. A) for the reviewer's reference, which is similar to the comparisons shown in Redemann & Gao (2024).

3. While I understand the scientific motivation of estimating CCN with machine learning techniques, especially given the CCN importance in the context of the aerosol indirect effect, submicron aerosol concentration is a variable that makes more sense to derive from a HSRL (e.g. Sawamura et al., 2017, <https://acp.copernicus.org/articles/17/7229/2017/>). If it is possible to apply a physically based algorithm to compute aerosol concentration, then I wonder whether deriving submicron aerosol concentration using a neural network would yield better results than deriving CCN. Moreover, the choice of supersaturation is not guided by physical arguments but by data availability. For example, I doubt that the real supersaturation values in these stratocumulus clouds exceed 0.2%, whereas the value used in the article is 0.4%. I am mainly interested to know the authors' opinion regarding whether aerosol concentration is a variable that we should focus on rather than CCN (I am not expecting a revised manuscript that address this point, but I am very interested in learning from the authors' perspective).

This is an interesting question, and we would like to thank the reviewer for bringing it up. In theory, developing a ML model for submicron number concentration is feasible. From a practical perspective, whether we should focus on predicting aerosol number concentration rather than CCN may depend on the intended goal of the ML-predicted data set. As the reviewer mentioned, CCN is more important in the context of evaluating the aerosol indirect effect. One benefit of using a ML-predicted CCN dataset, as opposed to translating from aerosol concentration, is that no assumptions/estimates of aerosol type, chemistry, or hygroscopicity are needed to determine CCN-nucleating ability of a predicted aerosol concentration. Additionally, we agree that a choice of 0.4% supersaturation is driven by data availability rather than physical consideration. In applications of this CCN dataset, the relationships between CCN and cloud droplets may be more evident at the actual environmental supersaturation than at 0.4%. In many ways, we have viewed the ML-CCN prediction method as a way of extending in situ CCN observations to broader horizontal and vertical coverage, and this supersaturation argument is also a limitation when using in situ CCN observations. It may be beneficial for future campaigns to run CCN counters more frequently at lower supersaturations and/or for this and other ML-prediction methods that use supersaturation as a predictor to evaluate prediction ability across a broader range of supersaturations.

4. In 2013-2014 we wrote a pre-ORACLES article (Painemal et al., 2014) aiming at documenting how cloud microphysical properties changed over the SE Atlantic and the role of cloud top height and aerosol layer altitude. Similar to Lenhardt et al. (2026), we found a strong control of stability, manifested in a regional distribution that gave rise to two distinct patterns north and south of 5° S. The area north of 5° S

was particularly interesting because cloud droplet effective radius ( $R_e$ ) and LWP were anticorrelated, which appeared to be mediated by changes in the boundary layer height. The regional analysis also described key differences in cloud top height and aerosol base height from CALIPSO between the northern and southern part of the ORACLES domain. Of course, ORACLES data are richer than CALIPSO and MODIS, but I am mentioning this paper because Lenhardt et al. captured in greater detail those processes we observed with satellite data. While I am hoping that our paper might help provide a regional context to this ORACLES analysis, please don't feel obligated to cite it.

Painemal, D., S.Kato, and P.Minnis (2014), Boundary layer regulation in the southeast Atlantic cloud microphysics during the biomass burning season as seen by the A-train satellite constellation, *J. Geophys. Res. Atmos.*, 119, 11,288–11,302, doi:10.1002/2014JD022182.

Thank you for sharing this paper! The citation has been added to the reference list. Additionally, we have added a sentence in Lines 402-405 of the updated manuscript as an additional motivating/contextual factor in using LTS for the k-means clustering analysis, as having another SEA-specific example will strengthen the reasoning. Upon adding this, the beginning of the subsequent sentence was also edited to help the flow of the writing and add additional clarity: ***“Additionally, Painemal et al. (2014) found stability to be a strong control on cloud microphysical properties over the SEA, where  $R_{eff}$  and LWP both decrease with LTS for observations north of 5°S, a pattern that is not observed south of 5°S where LTS values are higher. Over the Eastern China Ocean Additionally, Zhao et al. (2025) recently found that...”***

Other comments:

Line 31: For a technical paper, this information is a bit redundant.

This sentence and the one after it were adjusted to the following: ***“Clouds play a significant role in the climate system by regulating the atmosphere’s radiative budget and surface precipitation, and they form when water vapor condenses onto atmospheric aerosols that serve as cloud condensation nuclei or ice nucleating particles. To improve their accuracy in climate model projections, the impact of such aerosols cloud condensation nuclei (CCN) and ice nucleating particles on cloud properties must be better understood and quantified (Seinfeld et al., 2016).”***

Line 131-132: ***“cloud edge humidification effects are considered in the prediction of NCCN under dry conditions”***. What type of cloud edge humidification effects can be captured if reanalysis cannot replicate this? Moreover, gradients in relative humidities for cloud edges occur at scales much smaller than the reanalysis resolution. It seems that the only

humidification effect that can be captured is that dictated by the environmental relative humidity.

We would like to thank the reviewer for bringing this up and acknowledge that reanalysis is unable to capture cloud edge humidification effects well. Here, the goal was to communicate that we incorporate RH in the prediction to reduce the effect of aerosol swelling in very humid, cloudy regions, which typically only occur at  $RH > 80\%$ . We expect for this kind of persistently cloudy regime that MERRA-2 errors in RH are smaller than in other regimes, and expect differences to be smaller above cloud, which is where most of our data comes from. Additionally, RH is not a strong predictor of CCN in our models compared to the lidar observables. We recognize and acknowledge that this is a possible source of error in the ML-CCN predictions. However, we remain confident that MERRA-2 can adequately capture the broad trends and patterns in environmental RH in this regime; therefore, the uncertainty of CCN prediction due to RH is expected to be minimal. To communicate this, we have changed the wording in Lines 141-143: *“Additionally, since relative humidity (RH) is one of the predictors used to train the model, ~~cloud-edge humidification~~ the effect of aerosol swelling at high RH on lidar observables is ~~not~~ considered in the prediction of  $N_{CCN}$  under dry conditions (Redemann and Gao, 2024).”*

Line 144-145, you mean overlying smoke layer tends to underestimate satellite  $R_{eff}$  and cloud optical depth if not accounted for in the algorithm? (Meyer et al. 2013, JGR).

Yes, thank you for pointing out this mis-phrasing. The sentence was adjusted to the following in Lines 158-161, and the 2013 paper was added to the references list: *“The RSP  $R_{eff}$  retrieval is insensitive to spatial inhomogeneities and three-dimensional radiative transfer effects (Alexandrov et al., 2012b), a significant advantage over satellite retrievals, such as those from MODIS, which tend to ~~under~~overestimate **COT and  $R_{eff}$**  in cases with above-cloud absorbing aerosols **if not accounted for in the algorithm (Meyer et al., 2013; Meyer et al., 2025).**”*

When it is stated that lower tropospheric stability (LTS) provides a meteorological constraint, it is pertinent to clarify the spatiotemporal scale. LTS is somewhat a good predictor of cloud coverage for describing annual cycle and large scale processes. However, LTS and cloud coverage (and cloud microphysics) poorly correlate at synoptic scales. Because LTS in this study is really describing climatological changes between 2 regions over the SE Atlantic, it is more accurate to say that LTS provides a way to separate climatological regimes for the investigation of ACI (the concept of meteorology is just too broad).

Thank you for pointing out this important clarification! We have made the following wording changes to communicate that LTS represents environmental stability and climatological regime differences, as opposed to just referring to meteorology.

- Line 52: *“Previous studies have constrained the impact of meteorology **or climatological regimes...**”*

- Line 322: “To constrain and assess the impact of ~~meteorology~~ and environmental stability on ACI...”
- Line 330: “...LTS is a commonly used metric to constrain ~~meteorological effects~~ **the impact of stability** on clouds”
- Line 386-387: “...to separate observations of aerosol and cloud properties into different ~~meteorological~~ regimes...”
- Line 393: “We determined the final number of clusters by maximizing ~~meteorological~~ **climatological and geographic** distinctions...”
- Line 546-547: “...stratifying the data by LTS demonstrates the significant role that ~~meteorology~~ **climatological regimes with different environmental stability** plays in determining how clouds respond to increases in above-cloud  $N_{CCN}$ .”
- Line 636-637: “...speaks to the need to constrain future satellite observations by a stability-related parameter such as LTS to accurately represent ~~meteorological~~ **the impacts of different climatological regimes** on ACI metrics...”
- Line 655-656: “Additionally, to constrain the impact of ~~meteorology~~ **environmental stability** we cluster...”

Do the general findings of the article differ if instead of using the ML-based CCN, the aerosol extinction coefficient at 532nm from the HSRL were directly used for the analysis?

Because the native vertical resolution of EXT is 315 m, the EXT coefficient is unavailable within 100 m of cloud top. However, since we required BSC at 532 nm to be available for the ML-CCN prediction, we have this variable for each profile used in the manuscript. Therefore, we have provided an answer to this question using BSC at 532 nm to keep the same vertical binning and amount of data as used in the manuscript.

For the above-cloud ACI analysis (the AC dataset), using BSC in place of ML-CCN gives similar results, as shown in Figure C below. In this above-cloud region, most RH values fall below 60% (Figure B, left panel). We found in Lenhardt et al. (2023) that in the ORACLES region, CCN from the smoke plume observed at RH < 40-50% has an approximately linear relationship with BSC. Therefore, it follows that using BSC as a CCN proxy with which to calculate ACI metrics in a relatively dry environment would perform similarly as the ML-CCN.

However, when replacing ML-CCN with BSC for the below-cloud analysis (CE dataset), we find differences compared to using ML-CCN (Figure D). The below-cloud analysis in this case shows a stronger relationship than above-cloud. While this finding looks more typical for what is “expected” from ACI studies – that changes in the below-cloud CCN are more strongly related to changes in cloud microphysical properties, we contend that using BSC as a proxy for CCN in this humid MBL region is exaggerating the impact of below-cloud CCN. For the CE dataset, ambient RH tends to fall between 80-100% in the 500 m below cloud (Figure B, right panel). We have found in previous work that at high RH the CCN – BSC relationship starts becomes non-linear, as BSC overestimates CCN due to hygroscopic swelling of aerosols that increases the lidar observables without a corresponding increase in CCN (Lenhardt et al., 2023; 2025). At high RH, uncorrected BSC is not a realistic CCN proxy for evaluating ACI. Additionally, while previous studies have shown that smoke from

the SEA smoke plume is entrained into the MBL, we also expect that some of the aerosol population in the below-cloud region is sea salt. In Lenhardt et al. (2025), we again found that high RH causes nonlinearity in the CCN – BSC relationship. Additionally, we found that the CCN – BSC relationship differs for different aerosol types. While we found that aerosol  $R_{eff}$  is the dominant factor determining how CCN and BSC are related, this was most obvious for marine aerosols. Therefore, both aerosol size and ambient relative humidity should be considered when interpreting below-cloud results from Figure D.

While high RH and variations in aerosol size may not fully explain why the below-cloud response is higher when using BSC compared to ML-CCN, our previous work supports the hypothesis that in this case we are seeing that BSC at ambient RH is an unrealistic proxy for CCN. Since results using BSC in Figure 3 are similar to those using ML-CCN, it seems that BSC can be a good proxy for CCN in dry ambient conditions, but this does not hold for environments with high ambient RH and multiple aerosol types. Additionally, we expect that both above- and below-cloud  $N_{CCN}$  play a role in modulating cloud properties in this regime. Therefore, we don't necessarily expect to see strong correlation between below-cloud  $N_{CCN}$  and cloud top microphysical properties at cloud edge due to cloud top and edge entrainment happening simultaneously. While we expect that high RH and variations in aerosol size may be the dominant factors causing BSC to not be a good below-cloud  $N_{CCN}$  proxy, considering the expected roles of both above- and below-cloud  $N_{CCN}$  also suggests that the below-cloud  $N_{CCN}$  relationship is not expected to be as strong as shown when using BSC in Fig. D.

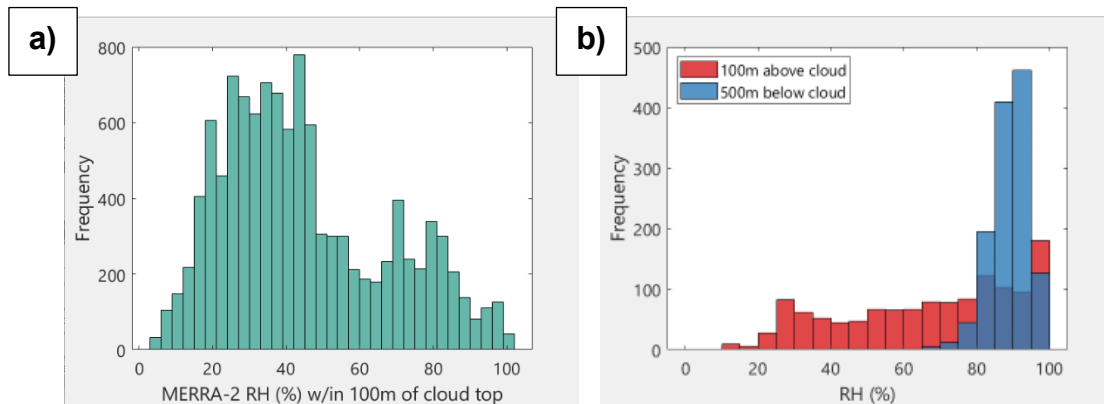

Figure B. Distribution of above-cloud RH for the AC dataset (left) and distribution of above- and below-cloud RH for the CE dataset (right).

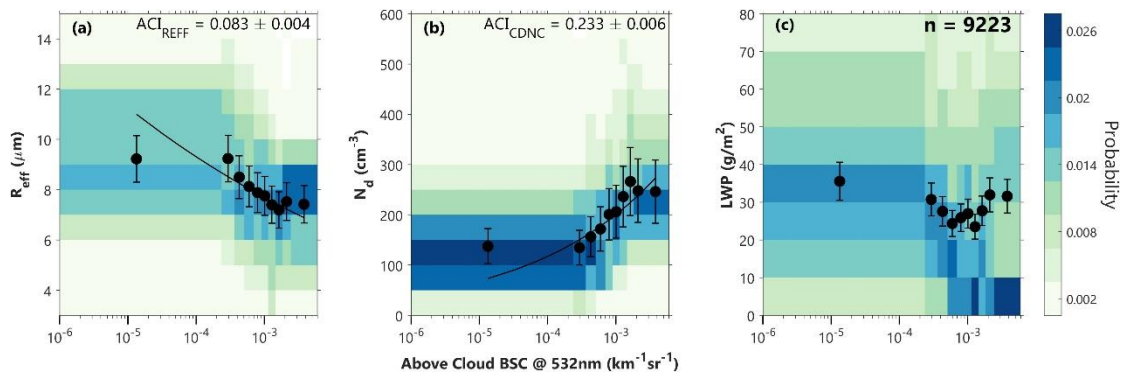

Figure C. Figure 4 from the manuscript replicated using BSC 532nm in place of ML-CCN.

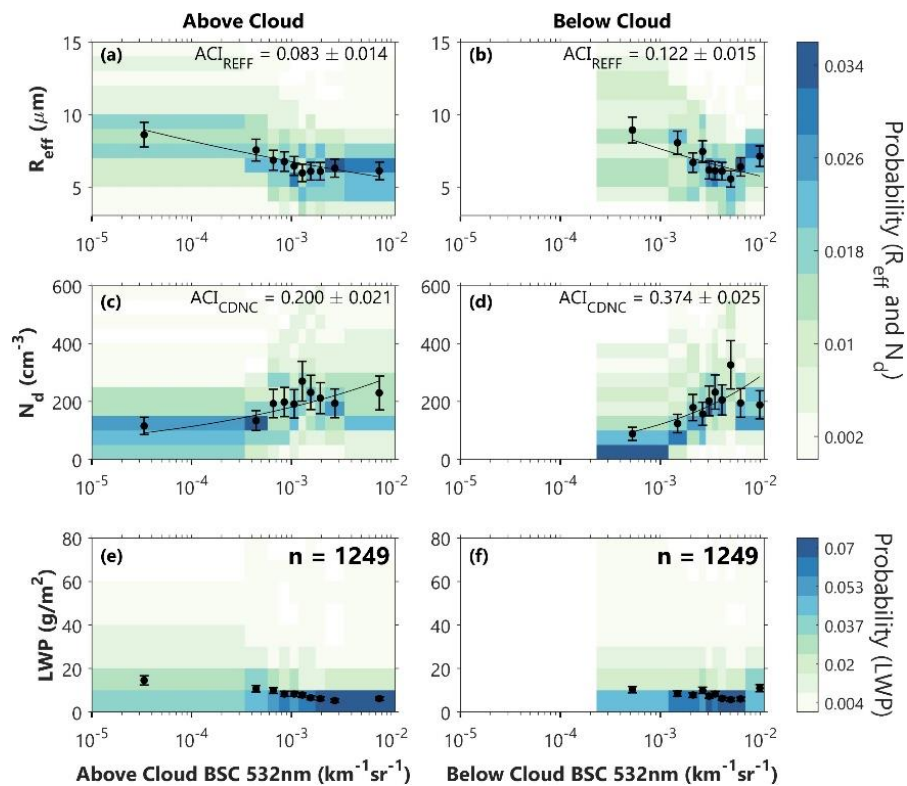

Figure D. Figure 7 from the manuscript replicated using BSC 532 nm in place of ML-CCN.

Figure 4 and similar bivariate histograms. The green color bar is a bit difficult to see. I would suggest to use a color palette with a discrete number of colors (no more than 12).

Thank you for this suggestion! All 2d histogram figures have been adjusted to use a colormap with discrete bins to improve visualization.

David Painemal, NASA LaRC

---

## Below-Cloud Edits

Upon replotting Figure B1 according to the binning and colorbar changes suggested by Reviewers 1 and 2, an LTS-dependence of the below-cloud  $N_{CCN}$  relationship with cloud properties was more evident compared to how it was plotted originally. In this figure, we now see more clearly the opposite pattern as observed in Figure 5, where cloud sensitivity to increasing below-cloud  $N_{CCN}$  increases as LTS increases. Additionally, once these cloud edge observations are split into LTS regimes, there are very few that fall in the cluster with the highest LTS. Therefore, we argue that the weak below-cloud response evident in Figure 7 is because the dataset is dominated by samples within the relatively low LTS regimes, and the high LTS response being washed out when combined with the entire CE dataset. Therefore, we have moved Figure B1 to Section 3.2 as the new Figure 9 and added the following paragraph:

***“Lastly, we investigate the LTS dependence of the below-cloud  $N_{CCN}$  relationship to cloud top microphysical properties using a similar approach as in Fig. 5. Data from the CE data set are assigned to the existing clusters determined from AC data set so that both analyses are directly comparable. These results are shown in Fig. 9, where we observe from the fit lines and ACI metrics a trend inverse of that observed for the above-cloud  $N_{CCN}$ . That is, as LTS increases, the sensitivity of cloud properties to increasing below-cloud  $N_{CCN}$  increases. This suggests that in less stable environments, entrainment mixing of above-cloud BBA into the cloud layer is the dominant process responsible for the microphysical changes to stratocumulus cloud properties. However, in more stable environments, where vertical mixing is suppressed and low-level cloud cover increases, the lack of such entrainment mixing results in a stronger response of cloud properties to increasing below-cloud  $N_{CCN}$ . Another important finding from this analysis is that most observations in the CE dataset fall into the first two clusters characterized by relatively low LTS. Therefore, when considering the total impact of below-cloud  $N_{CCN}$  across all clusters, as done in Fig. 7, low LTS cases dominate the analysis, explaining why the relationship between cloud properties and below-cloud  $N_{CCN}$  appears as weak and nearly negligible.”***

Section 4.1 was also edited to include a more in-depth discussion of the differing LTS dependencies and physical relationships for above- and below-cloud  $N_{CCN}$ . This section was re-titled as “Above- vs. below-cloud  $N_{CCN}$  relationships.” These changes and additions are outlined below:

#### ~~“4.1 Physical relationships~~ **Above- vs. below-cloud $N_{CCN}$ relationships**

~~Overall, the relationships analyzed here follow the major findings of Gupta et al. (2021), around which this study was formulated. That is, for cases where the smoke plume is in contact with the cloud top, there is evidence of these CCN impacting cloud top microphysical properties. For all cases, increases in above-cloud  $N_{CCN}$  were associated with increases in  $N_d$  and decreases in  $R_{eff}$ . Cases of contact between cloud top and the BBA plume are associated with greater entrainment mixing (Diamond et al., 2018; Gupta et al., 2021), and our finding here reiterates those suggesting that entrainment of BBA that serve as CCN can result in nucleation of cloud droplets near the cloud top. **These relationships are evident regardless of BL aerosol loading, with a slightly dampened impact of above-cloud  $N_{CCN}$  in cases where the BL is relatively polluted.** Additionally, we found relatively weak relationships between below-cloud  $N_{CCN}$  and cloud top microphysical properties, but an indication that polluted BL conditions were associated with a dampened above-cloud  $N_{CCN}$  impact. However, it is important to consider that the above- and below-cloud  $N_{CCN}$  comparisons in this study were limited to observations within 5 km of cloud edge, and thus they may not be perfectly representative of below-cloud  $N_{CCN}$  impacts closer to cloud center. Future work should focus on better elucidating this relatively weak impact of below-cloud  $N_{CCN}$  compared to above-cloud  $N_{CCN}$ .~~

**Beyond this corroboration of in situ findings,** ~~One~~ a major focus of this study was the dependence of aerosol – cloud relationships on environmental stability. Based on a  $k$ -means clustering analysis using LTS as the sole clustering variable, we stratified observations of the cloud deck with collocated above-cloud  $N_{CCN}$  retrievals into four clusters which turn out to be geographically distinct, with LTS increasing from the northwestern part of the SEA toward the southeastern part closest to the African coast. This increase in LTS aligns well with observed decreases in SST and CTH. ~~By constraining the meteorology~~ **Using this method,** we find that environmental stability is an important governing factor in determining the sensitivity of cloud properties to increases in above-cloud  $N_{CCN}$ . As the ~~atmosphere~~ **lower-tropospheric layer** becomes more stable, cloud sensitivity to increasing above-cloud  $N_{CCN}$  decreases until there is almost no response (cluster 4; Fig. 5d, h). ~~This suggests that~~ **Less stable environments promote greater vertical growth of the cloud layer and mixing led by cloud top entrainment instability (e.g., Mellado, 2017; Gupta et al., 2021). These** ~~is~~ environments thereby supports the modulation of cloud

top properties by aerosols from the overlying smoke plume that are entrained into the cloud layer. The percent differences in ACI metrics between cluster 4 and cluster 1 are -73.9 % for  $ACI_{REF}$  and -74.3 % for  $ACI_{CDNC}$ , again indicating that ACIs depend strongly on environmental conditions. While we see from Fig. 4 that above-cloud ACIs are evident across the full data set, stratifying the data by LTS demonstrates the significant role that meteorology plays in determining how clouds respond to increases in above-cloud  $N_{CCN}$ . For example, comparing the full data set (Fig. 4a,b) to the cluster of data with the lowest mean LTS (Fig. 5a,e)  $ACI_{REF}$  increases from 0.093 to 0.161 (73.1 %) and  $ACI_{CDNC}$  increases from 0.275 to 0.452 (64.4 %). Therefore, stratifying data by environmental stability has a large impact on the magnitude, and arguably the accuracy, of the ACI metrics.

**Further, we find that constraining the below-cloud  $N_{CCN}$  – cloud property relationship using LTS elucidates ACI relationships that are not evident when considering the CE data set as a whole. Observations shown in Fig. 7 suggest that at and within 5 km of cloud edges, below-cloud  $N_{CCN}$  have a nearly negligible impact on cloud top microphysical properties, which by itself is a physically implausible result. However, upon assigning CE observations to the clusters determined in Fig. 5, we find that cloud sensitivity to increasing below-cloud  $N_{CCN}$  has the opposite dependence on LTS as for above-cloud  $N_{CCN}$ . That is, in more stable environments (cluster 4), decreased entrainment of above-cloud smoke aerosols into the cloud layer results in higher ACI metrics for below-cloud  $N_{CCN}$  than above-cloud  $N_{CCN}$ . Since high LTS promotes increased cloud fraction, selecting profiles at cloud edges with which to assess the simultaneous impact of above- and below-cloud  $N_{CCN}$  preferentially results in a subset of data with lower average LTS. Therefore, when considering all CE cases together, the stronger impact of below-cloud  $N_{CCN}$  for high LTS cases is masked. This finding speaks again to the importance of constraining environmental stability when assessing ACI and identifies a limitation of our methodology. Additionally, these stability-related findings corroborate those from additional other ORACLES ACI-focused studies. Using ORACLES 2016 in situ observations, Diamond et al. (2018) found a weaker relationship between cloud properties and above-cloud BBA compared to the below-cloud effect. Since cloud-focused in situ flight legs often target optically thick and continuous cloud segments, it is likely that these observations are characterized by a higher LTS than most of our CE cases., and similarly Moreover, a majority of the 2016 observations in this study are categorized by a high average LTS (Fig. 6), where we, like Diamond et al. (2018) also find stronger below-cloud ACI relationships than those observed above-cloud see above-cloud ACI relationships begin to weaken. Kacarab et al. (2020) discussed the sensitivity of ACI to velocity-limited and aerosol-limited regimes in the ORACLES 2017 observations, and this analysis indirectly suggests a dependence on updraft velocity via**

*environmental stability. Future work exploring differences in aerosol properties, cloud properties, and other meteorological variables within each of these clusters could further assess and constrain ACI in this region.”*

Section 4.2 was created to separate the original Section 4.1 into two separate sections. This section is titled “Reversals in expected patterns.” The following paragraph was added (Lines 601-611) to discuss patterns in cluster 4 of the new Fig. 9, showing how  $R_{\text{eff}}$  and  $N_d$  change with increasing below-cloud  $N_{\text{CCN}}$  in the highest LTS cluster. Additionally, the three new references in this paragraph were added to the reference list.

***“A similar reversal in the expected response to increasing  $N_{\text{CCN}}$  is visible in cluster 4 of Fig. 9, though in this case it occurs at low  $N_{\text{CCN}}$ , and not within the highest concentration  $N_{\text{CCN}}$  bin. This increase in  $R_{\text{eff}}$  and decrease in  $N_d$  occurs for  $N_{\text{CCN}}$  bins between approximately  $170\text{-}360\text{ cm}^{-3}$ , representing relatively clean BL conditions. Therefore, it is unlikely that these patterns are attributable to the semi-direct effect of above-cloud BBA. Rather, this may be a case in which low  $N_{\text{CCN}}$  near cloud base creates a low concentration of larger droplets that is maintained by the collision-coalescence process (Saleeby and Cotton, 2005) before  $N_{\text{CCN}}$  increases above  $400\text{ cm}^{-3}$ . Populations of large droplets at cloud base have been observed in clean aerosol regions for convective clouds over the Amazon by Braga et al. (2017), and this effect has been hypothesized to be attributable to the presence of giant CCN (GCCN) by this and other studies (Yin et al., 2000; Saleeby and Cotton, 2005). It is likely that the below-cloud  $N_{\text{CCN}}$  population in this region includes sea salt particles, which are an aerosol type more likely to reach such sizes to be classified as GCCN. However, this remains a hypothesis to explain the increase in  $R_{\text{eff}}$  and decrease in  $N_d$  at low below-cloud  $N_{\text{CCN}}$  as the exact composition and size of below-cloud  $N_{\text{CCN}}$  is outside the scope of this analysis.”***

The following edits were made in Section 4.3 in relation to the below-cloud  $N_{\text{CCN}}$  findings:

- Line 613-614: *“The major implication of these results confirming those of an in situ-based study (Gupta et al., 2021) is that, **with the right considerations regarding environmental stability**, ACI can reliably be estimated using only these remote sensing-based observations.”*
- Line 621-624: *“...we found that changes in above-cloud  $N_{\text{CCN}}$  are more strongly related to changes in cloud top microphysical properties **under unstable conditions**, while ~~than~~ **changes in the below-cloud  $N_{\text{CCN}}$  have a more significant***

*impact on cloud properties under stable conditions. However, without vertically resolved  $N_{CCN}$  from the ML-CCN method, this **above- and below-cloud  $N_{CCN}$  distinction would not have been possible.***

- Line 632-638: **“However, one important limitation inherent to this method is that the selection of cloud edge cases for assessing the simultaneous impact of above- and below-cloud  $N_{CCN}$  may preferentially create a subset of primarily low LTS observations which needs to be considered when interpreting results. Consequently, ~~Lastly, the dependence of cloud sensitivity to increasing above-cloud  $N_{CCN}$~~  **ACI on LTS speaks to the need to constrain future satellite observations by a **stability-related** parameter such as LTS to accurately represent meteorological impacts on ACI metrics, which may also impact their parameterization in models.**”**

The following edits were made in Section 5 in relation to the below-cloud  $N_{CCN}$  findings:

- Lines 648-663: *“We found that our results align well with those of the in situ-based study (Gupta et al., 2021). That is, we see a decrease in  $R_{eff}$  and increase in  $N_d$  when the BBA concentrations are significant within 100 m of the cloud top, and this finding is independent of horizontal proximity to cloud edge **and the magnitude of BL aerosol loading.** ~~Using clear-sky, cloud-adjacent ML-CCN profiles, we examine the simultaneous impact of above- and below-cloud  $N_{CCN}$  and find that the relationship between cloud top microphysical properties and above-cloud  $N_{CCN}$  is stronger than their relationship with below-cloud  $N_{CCN}$ . This finding is independent of the magnitude of BL aerosol loading. Therefore, it appears that entrainment of BBA at cloud top in the SEA is a major control of cloud top microphysical properties. However, the dominance of this effect in comparison to that of below-cloud  $N_{CCN}$  remains an open question that would likely require modelling studies to further assess. Additionally, to constrain the impact of meteorology~~ **environmental stability** we cluster the above-cloud **and cloud edge** data sets by LTS, finding that cloud sensitivity to increasing above- **(below-)cloud  $N_{CCN}$  decreases (increases) as LTS increases. Therefore, it appears that entrainment of above-cloud BBA into the stratocumulus cloud layer is a major control of cloud top microphysical properties under relatively unstable conditions, while the below-cloud  $N_{CCN}$  effect on cloud properties is stronger under more stable conditions. The strongest  $R_{eff} - N_{CCN}$  and  $N_d - N_{CCN}$  relationships are found in the northwestern part of the ORAGLES region where average LTS is around 10 K, and the relationships weaken moving southeast towards the African coast. Therefore, while we do see evidence of an aerosol effect on cloud properties, this **both above- and below-cloud  $N_{CCN}$  effects are** is highly dependent on environmental stability.”***

The following edits were made in the Abstract in relation to the below-cloud  $N_{CCN}$  findings:

- Lines 22-27: “Additionally, we find that **above-cloud  $N_{CCN}$  – cloud property relationships are similar for cloud edge and cloud center observations.** †The relationship between below-cloud  $N_{CCN}$  and cloud top properties is **strongly dependent on LTS, with ACI metrics increasing as LTS increases. This speaks to the dominance of above-cloud smoke entrainment as a modulator of stratocumulus cloud properties under unstable conditions, while below-cloud  $N_{CCN}$  nucleation dominates in stable environments.** ~~weak and that above-cloud  $N_{CCN}$  – cloud property relationships are similar for cloud edge and cloud center observations.”~~
